# Supplementary figures and images for: Spherical Silica Functionalized by 2-Naphthalene Methanol Luminophores as a Phosphorescence Sensor
Source: MDPI journal article supplement (doi:10.3390/ijms222413289), 2021-12-10

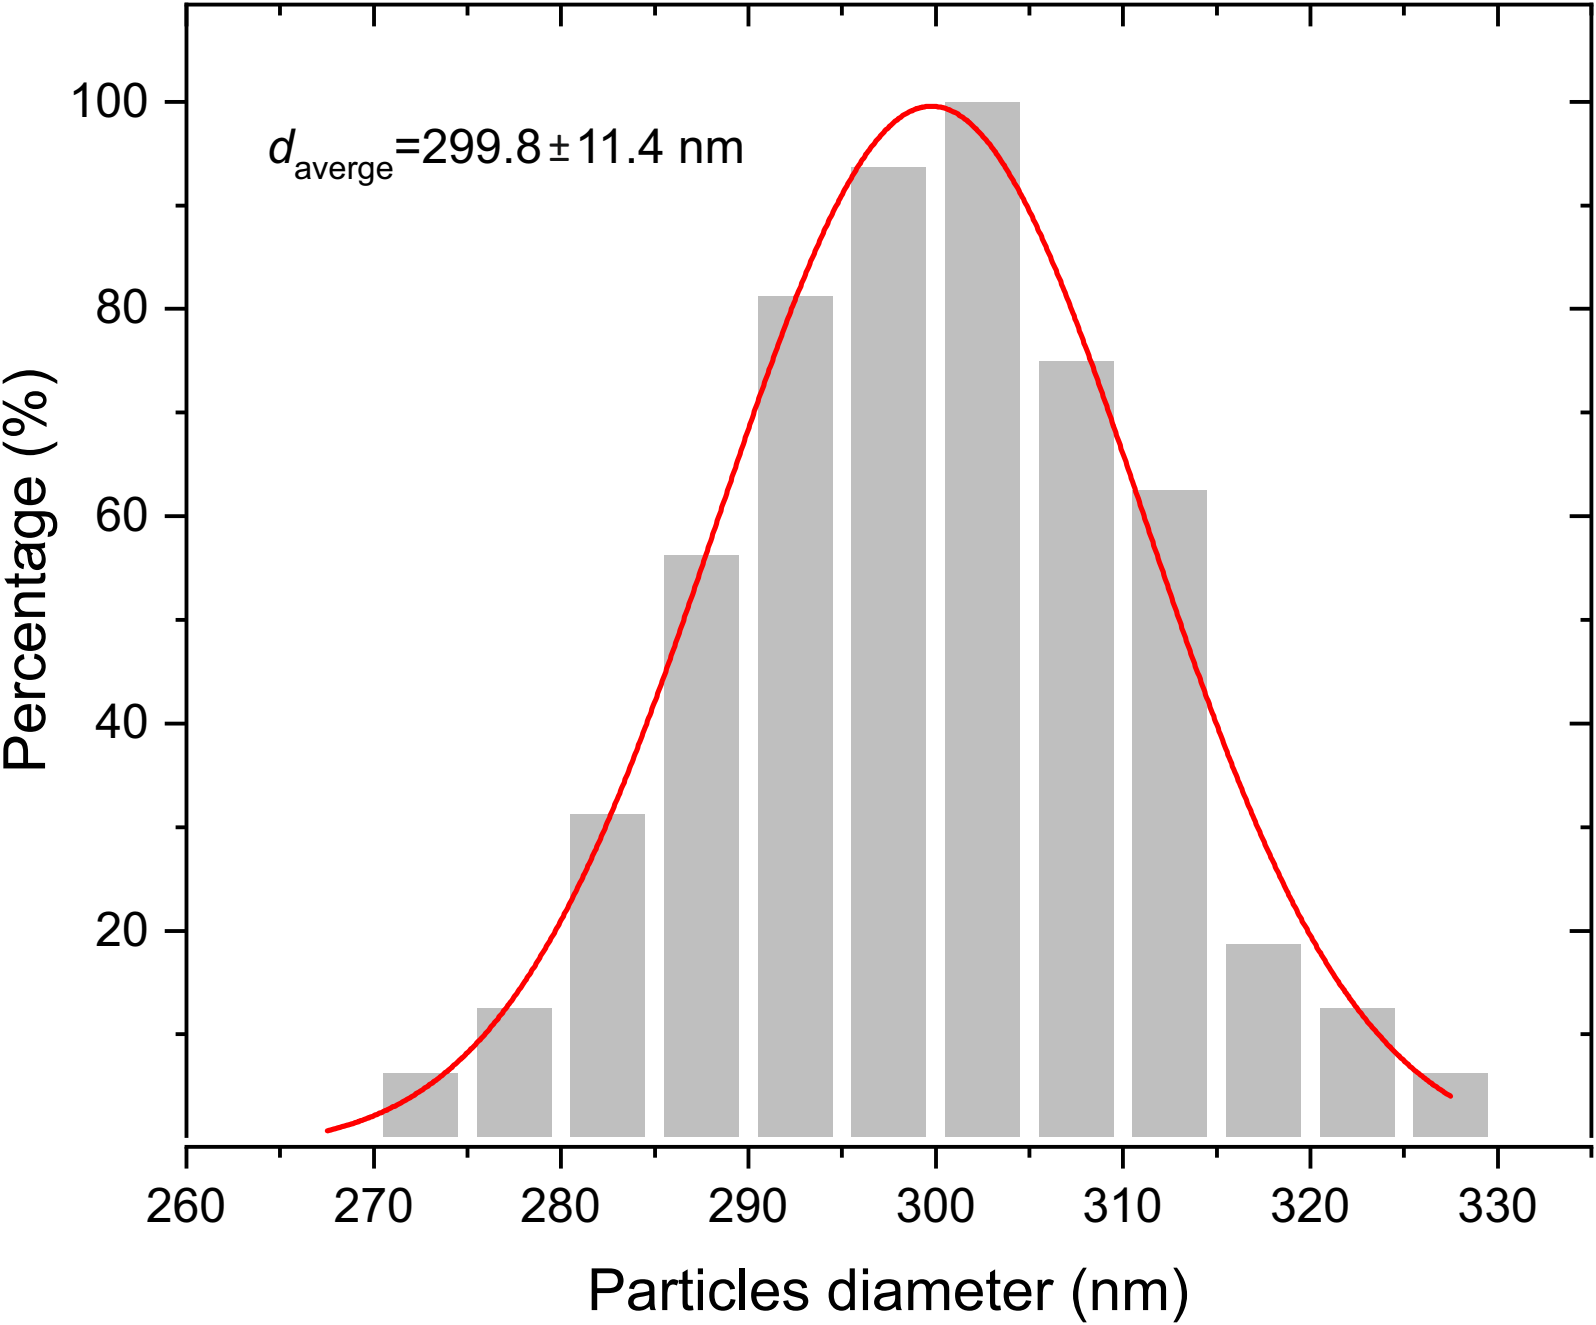

Supplement: s1 [file s1]
